# Supplementary material for: Distinct Evolutionary Profiles and Functions of microRNA156 and microRNA529 in Land Plants
Source: MDPI journal article supplement (doi:10.3390/ijms222011100), 2021-10-14

A

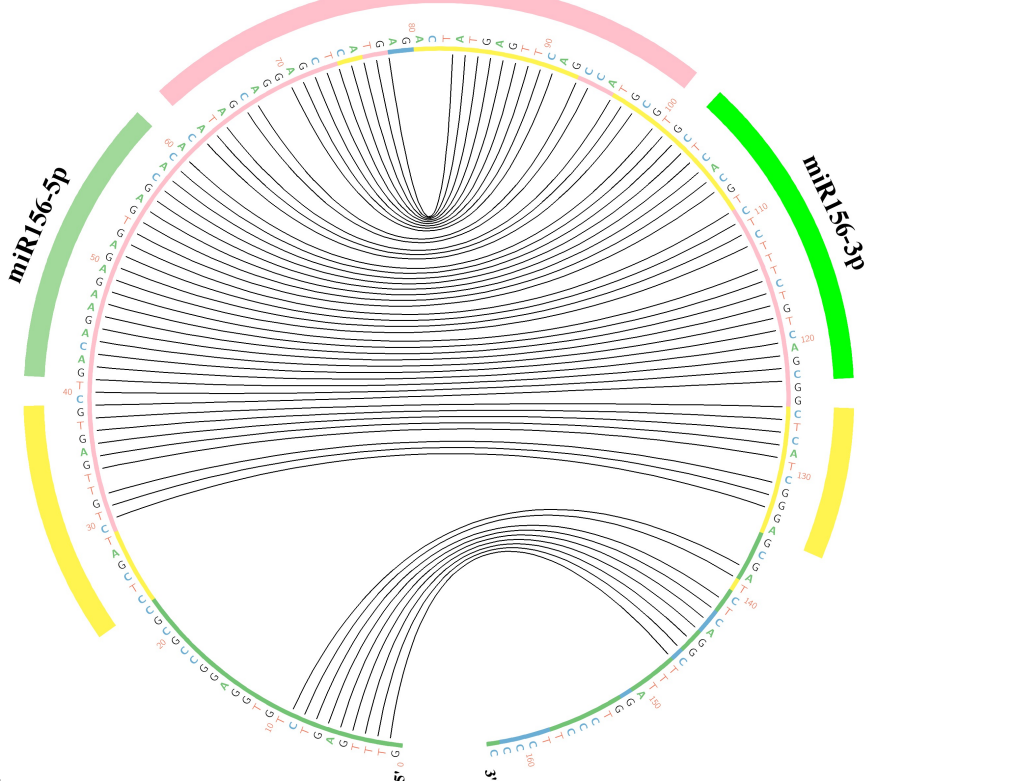

B

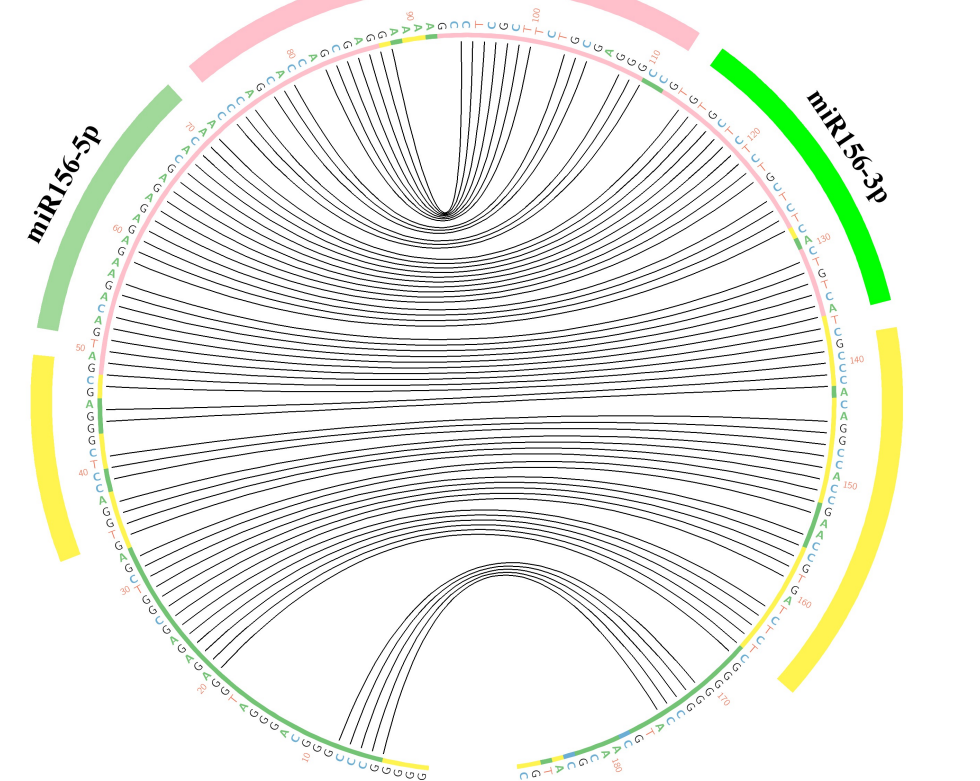

C

## miR529 in six representative plant

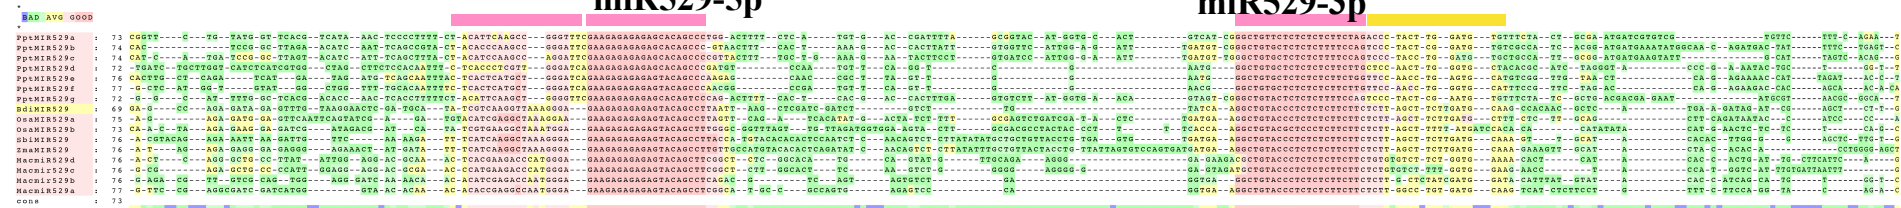

## miR156 in six representative plant

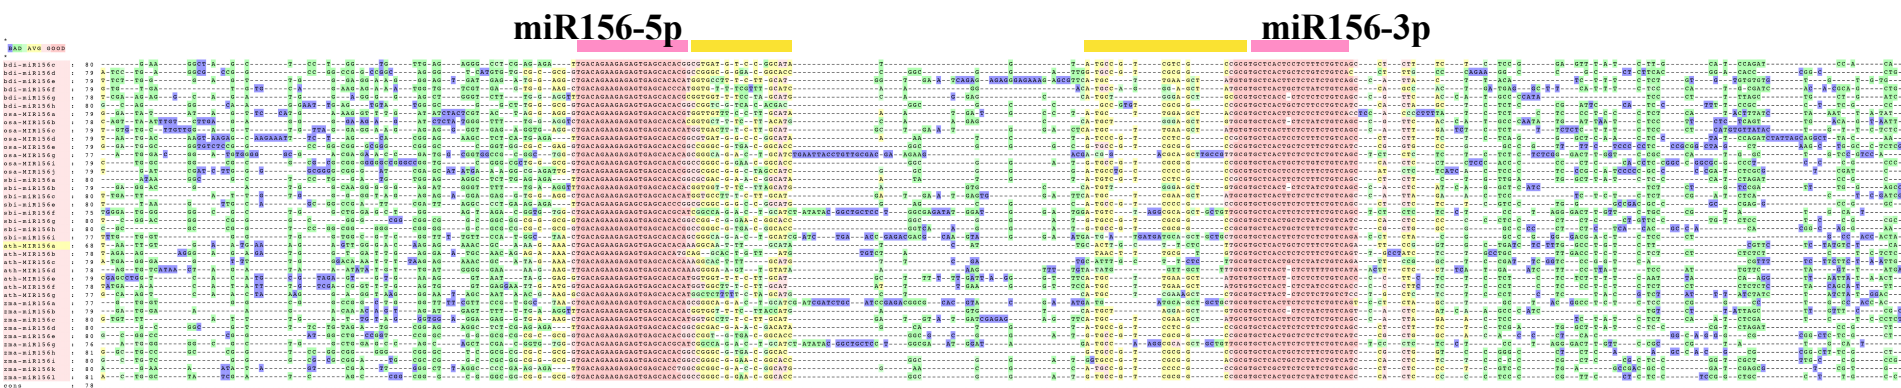

## miR156 in *P. abies*

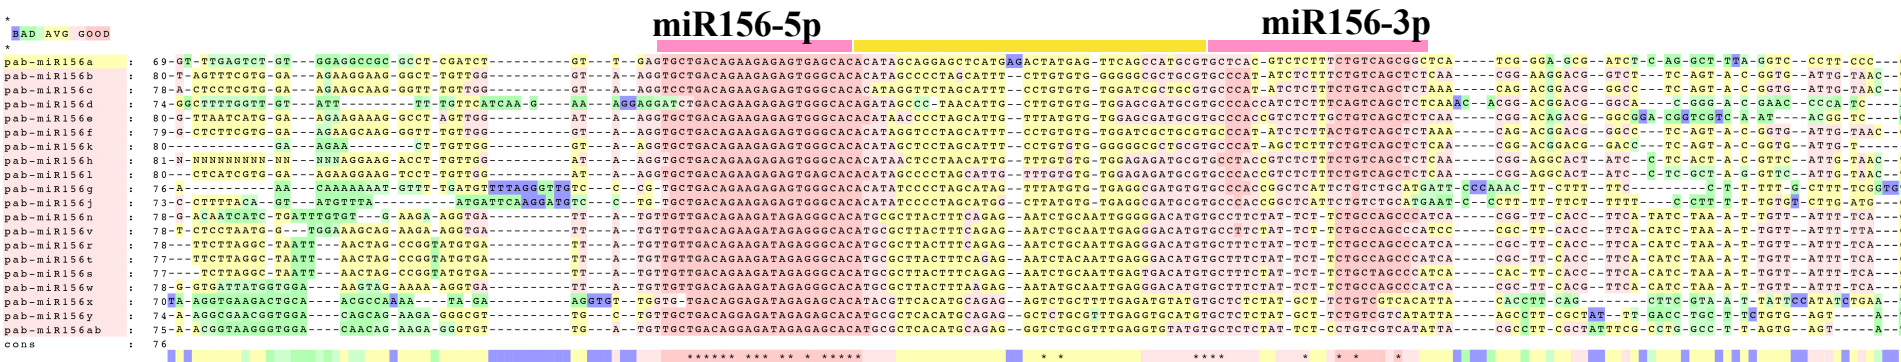

## miR156 that contain miR529-like sequence

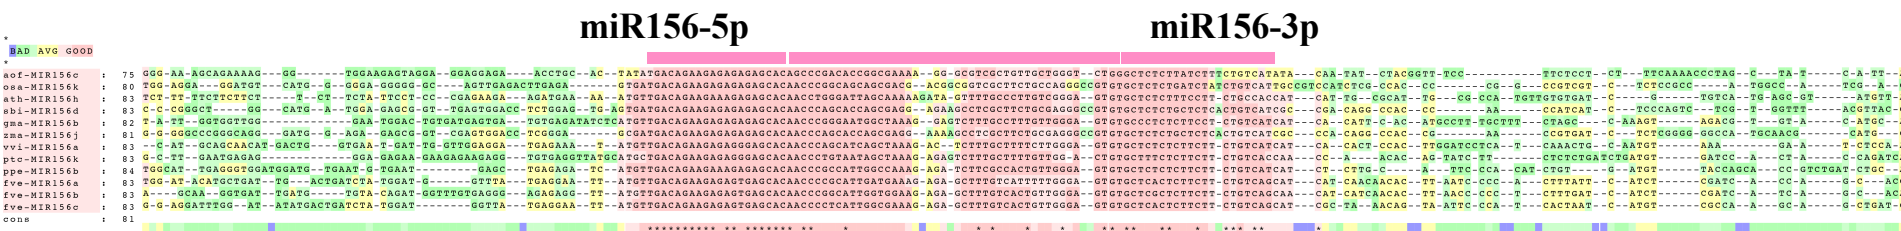

Supplement: s1 [file s1]
