# Supplementary material for: Distinct Evolutionary Profiles and Functions of microRNA156 and microRNA529 in Land Plants
Source: MDPI journal article supplement (doi:10.3390/ijms222011100), 2021-10-14

A

**Zma-miR156j** 5' --GAUGAC**AGAAGAGAGAGAGCACACCC**AGC-----3'

**Aqc-miR529** 5' --GUUGAC**AGAAGAGAGAGAGCACAAACCC**AUC-----3'

**Zma-miR529** 5' -----G**AGAAGAGAGAGAGUACAGCC**CUUGU-----3'

B

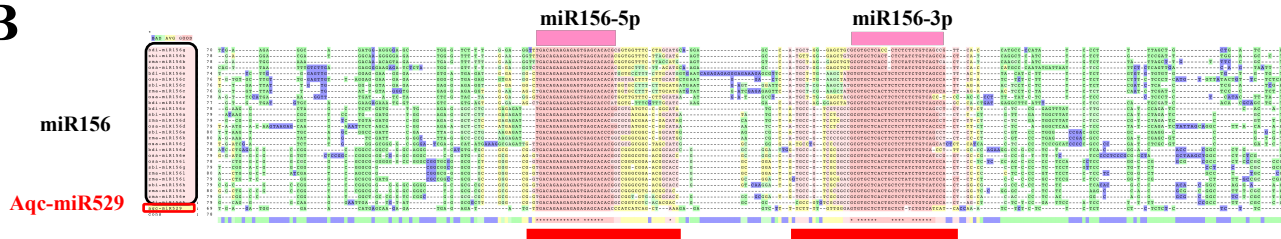

C

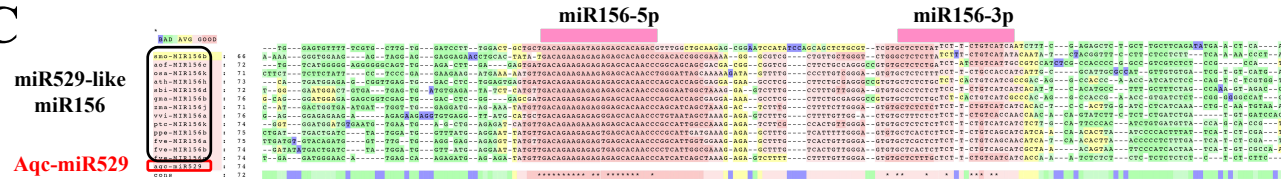

D

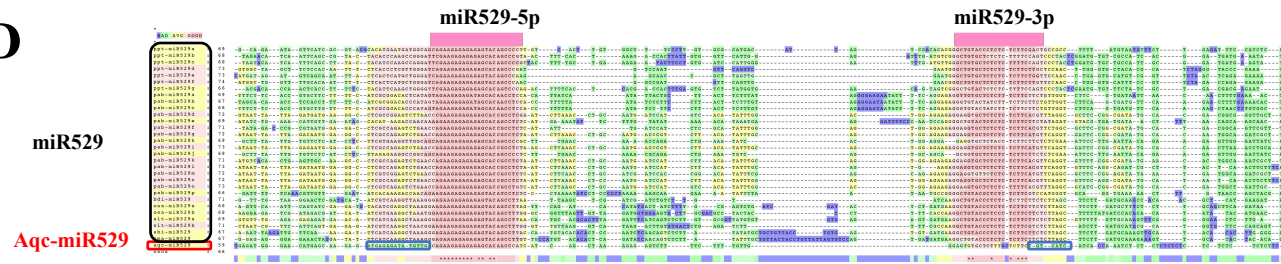

E

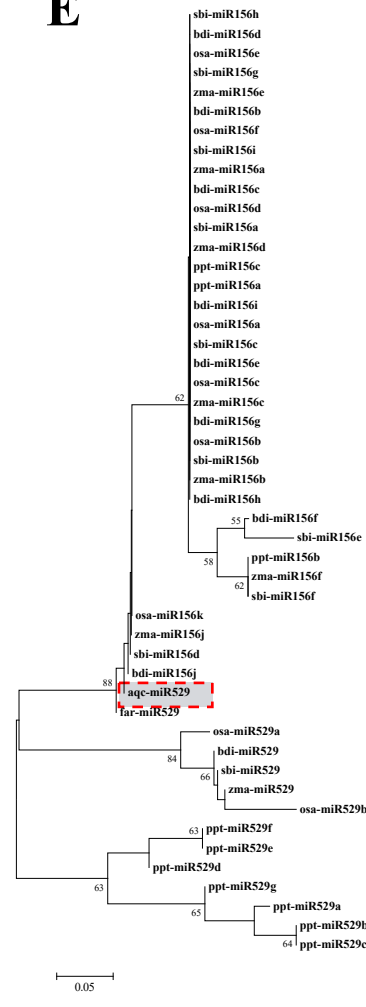

Supplement: s1 [file s1]
