# Supplementary material for: Distinct Evolutionary Profiles and Functions of microRNA156 and microRNA529 in Land Plants
Source: MDPI journal article supplement (doi:10.3390/ijms222011100), 2021-10-14

## Ath-miR156a

*M. polymorpha*\_14

*M. polymorpha*\_29

*M. polymorpha*\_46

**UGACAGAAGAGAGUGAGCAC**

A horizontal number line with vertical tick marks every 10 units, labeled from 0 to 100. A small circle is drawn around the tick mark for the number 50.

**UGACAGAAGAGAGAGGCAC**

|||||

**UGACAGAAGAGUGUGAGCAC**

**UGACAGAAGAGCGUGAGCGC**

# B

**scaffold 14: 2145841..2145860**

**scaffold 29: 515935..515954**

**scaffold 46: 1223892..1223911**

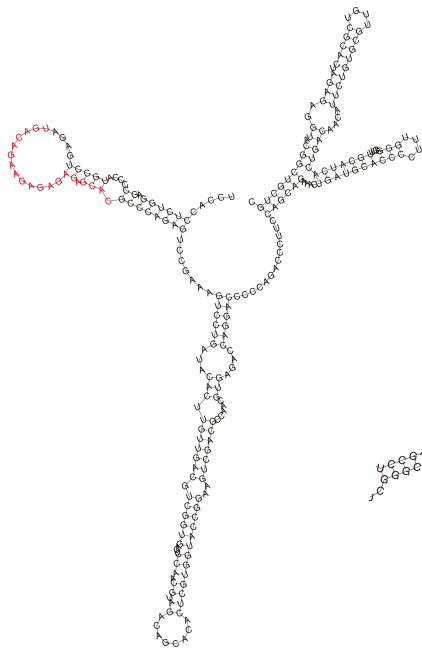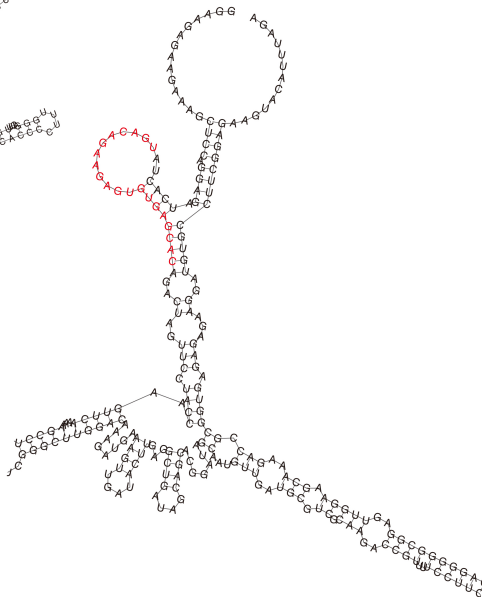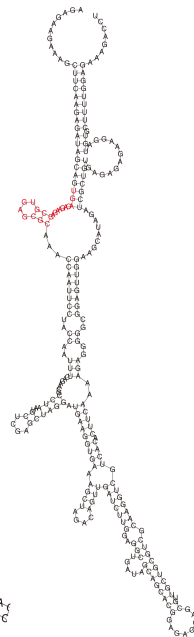

Supplement: s1 [file s1]
