# Supplementary figures and images for: Distinct Evolutionary Profiles and Functions of microRNA156 and microRNA529 in Land Plants
Source: MDPI journal article supplement (doi:10.3390/ijms222011100), 2021-10-14

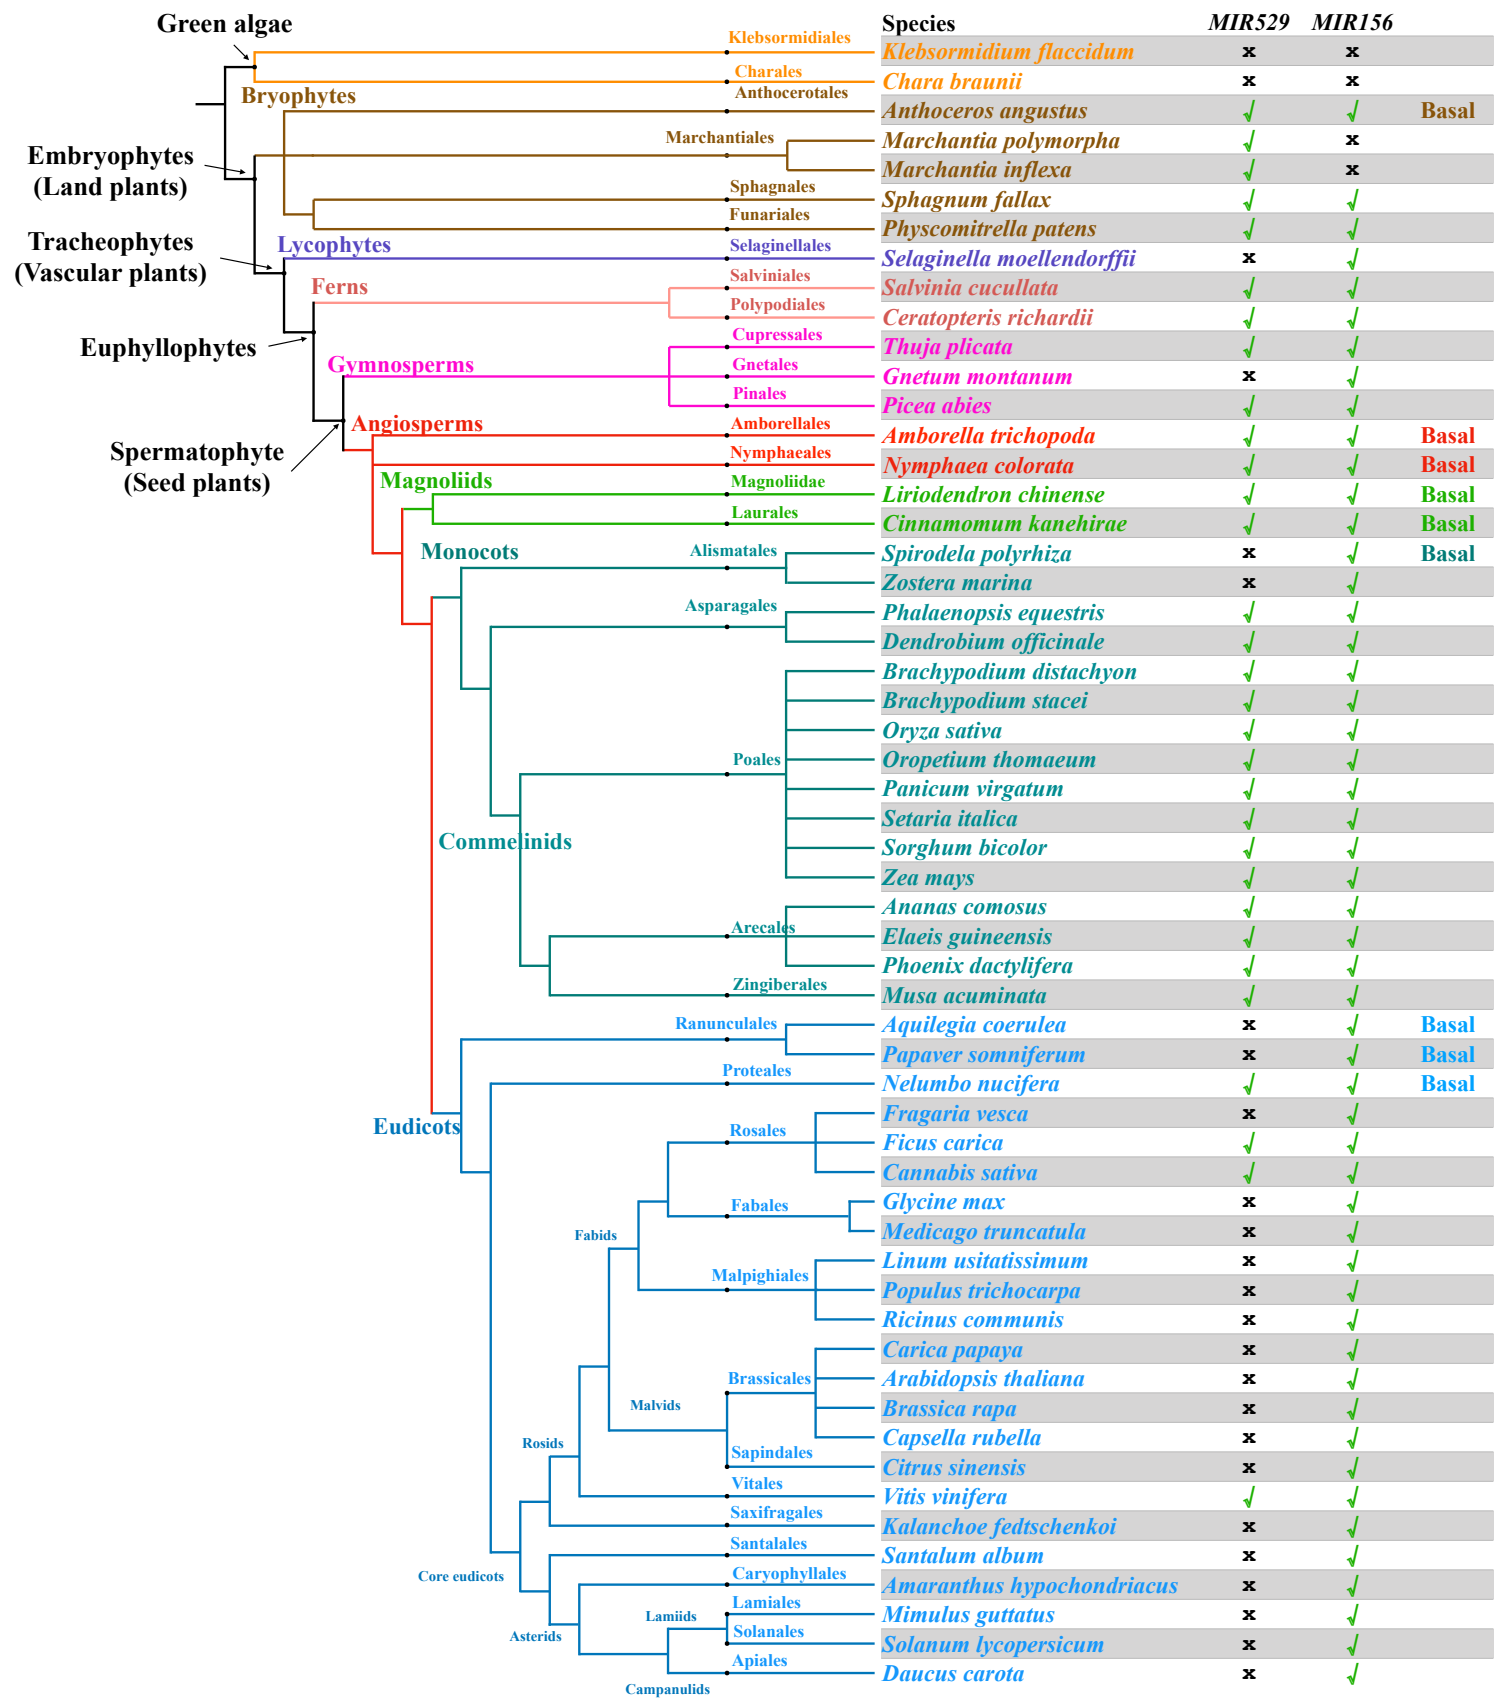

Supplement: s1 [file s1]

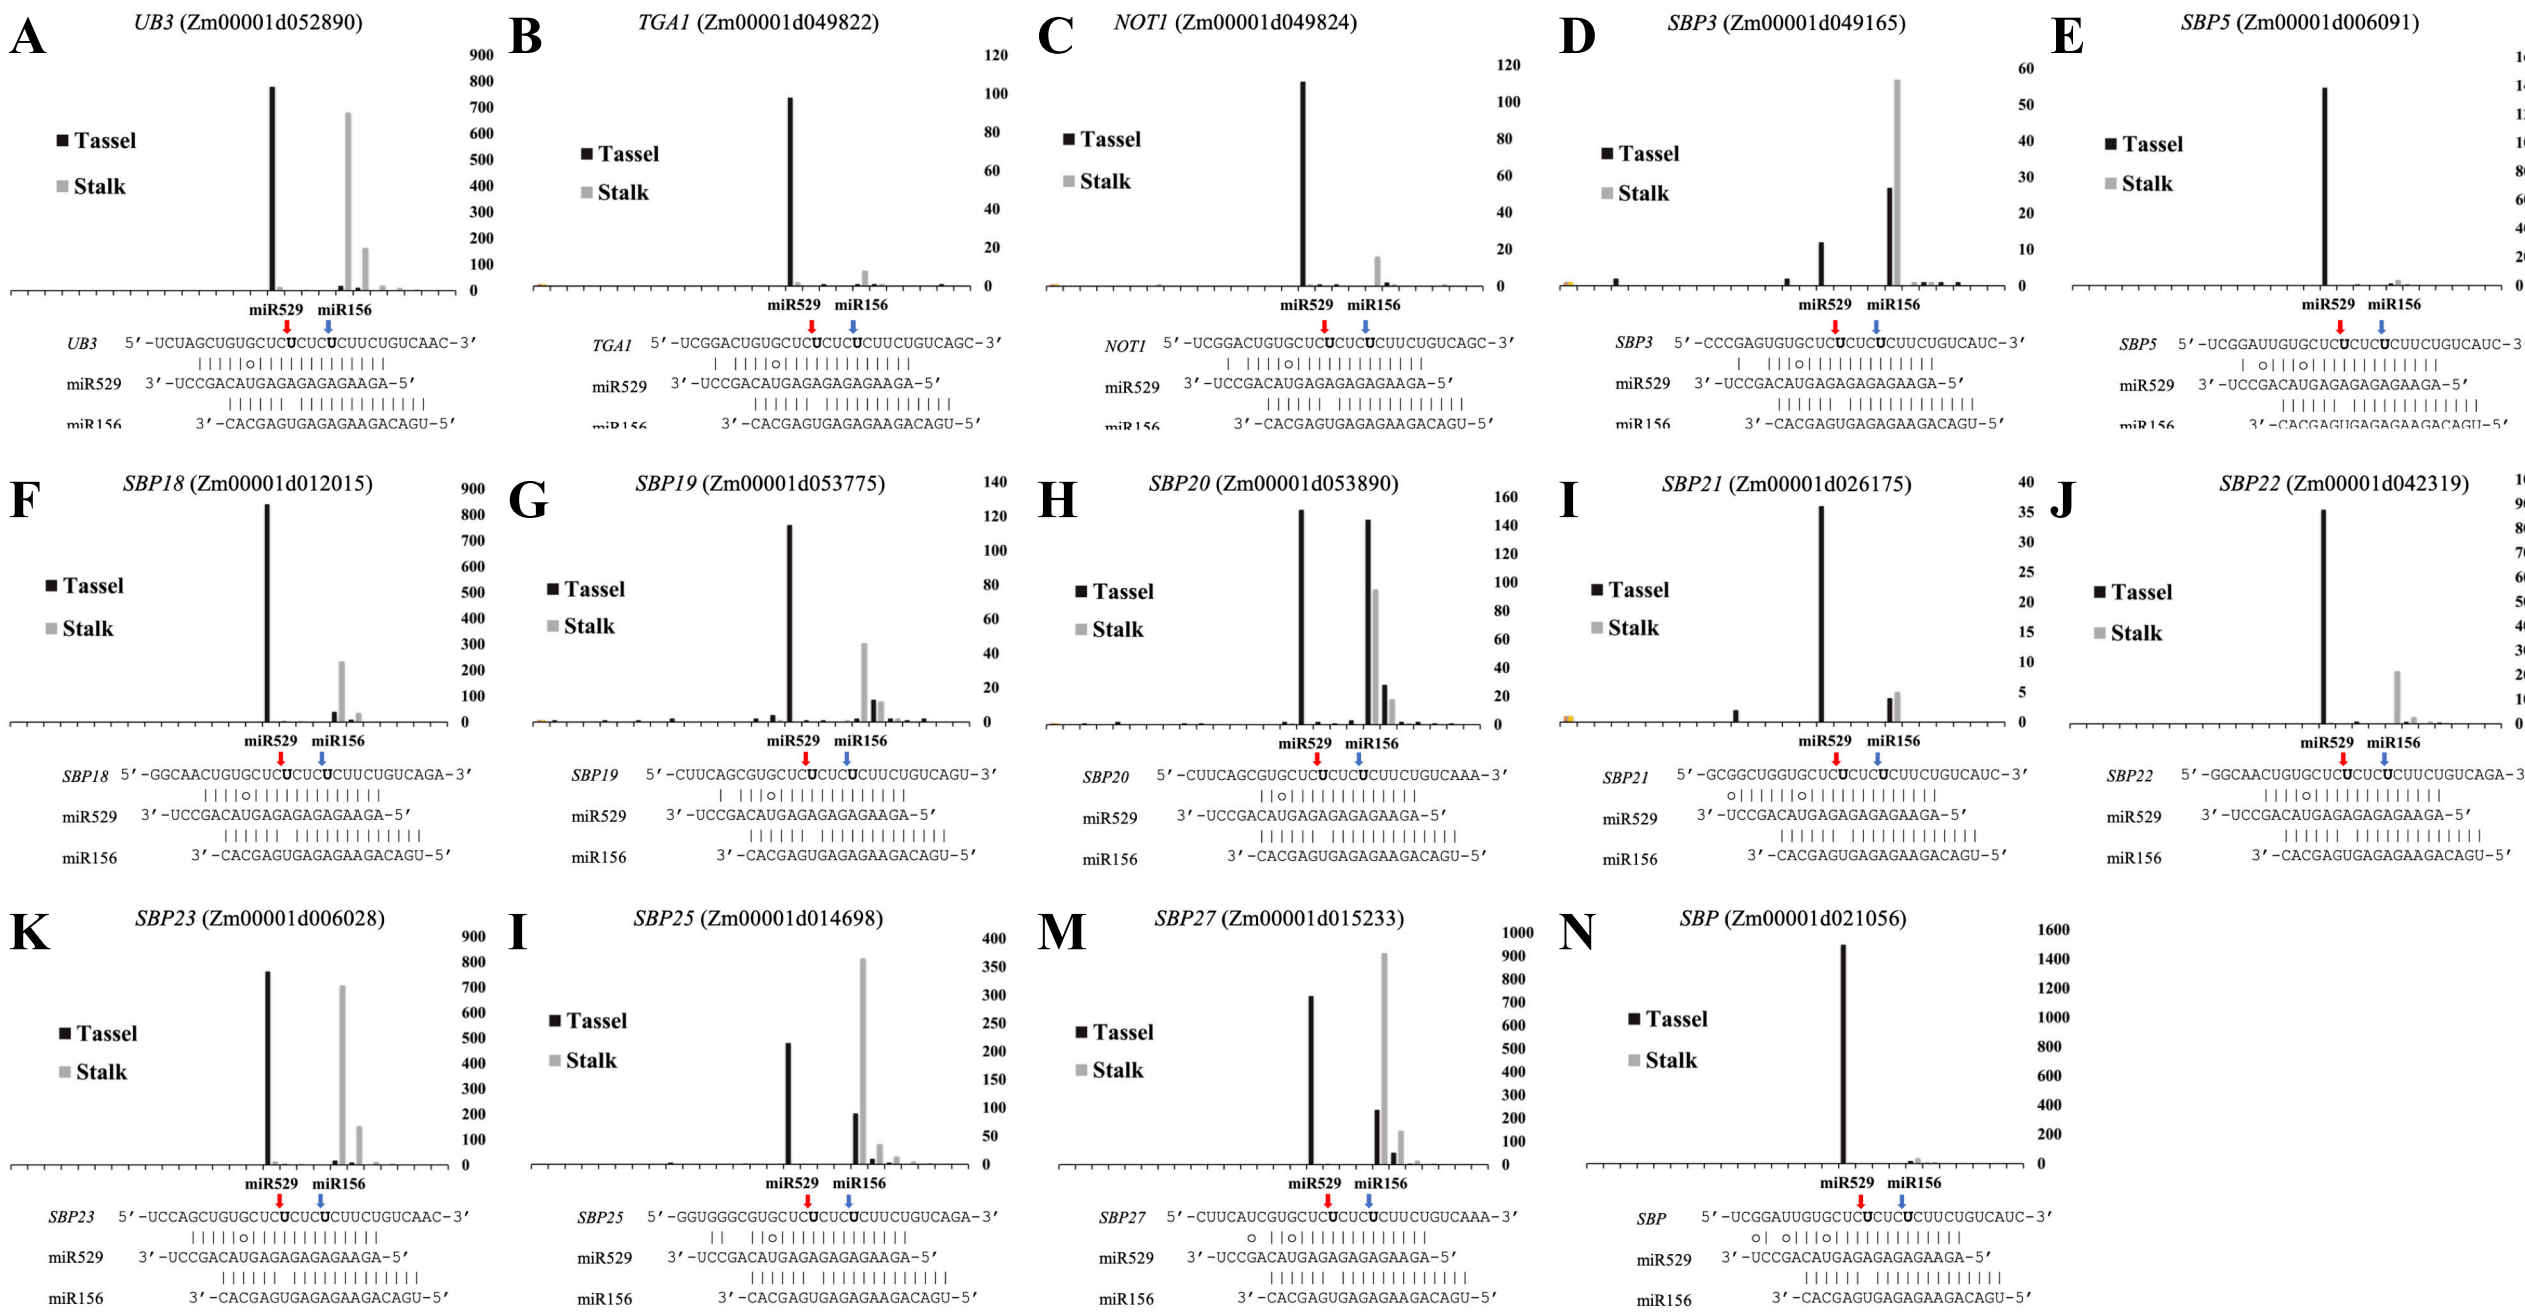

Supplement: s1 [file s1]
